# Supplementary material for: Determinants of Post-COVID-19 Conditions among SARS-CoV-2-Infected Patients in Saudi Arabia: A Web-Based Cross-Sectional Study
Source: MDPI journal article supplement (doi:10.3390/diseases10030055), 2022-08-23
Supplement: s1 [file s1]

# Questionnaire

---

## Demographic data:

- **Gender**
  - ☐ Male
  - ☐ Female
- **Age**
  - ☐ < 25
  - ☐ 25–40
  - ☐ 40–60
  - ☐ 60 or more
- **Body mass index**
  - ☐ underweight
  - ☐ Normal
  - ☐ Overweight
  - ☐ obese
- **Smoking status**
  - ☐ Smoking
  - ☐ Nonsmoker
  - ☐ Current smoker
  - ☐ Ex-smoker
- **Alcohol habit**
  - ☐ Yes
  - ☐ No
- **Number of comorbid disorders**
  - ☐ 0
  - ☐ 1
  - ☐ 2
  - ☐ 3
  - ☐ 4 or more
- **Type of comorbid disease you have (multiple answers)**
  - ☐ none
  - ☐ Diabetes
  - ☐ Hypertension
  - ☐ Obesity
  - ☐ Chronic respiratory disease
  - ☐ Cardiovascular disease

- ☐ Liver disease
  - ☐ Psychiatric disorders
  - ☐ Renal impairment
  - ☐ Other
- **Under chronic medication**
  - ☐ Yes
  - ☐ No

## **Acute phase of covid19 infection**

- **Acute Covid19 severity**
  - ☐ Asymptomatic
  - ☐ Mild
  - ☐ Moderate
  - ☐ Severe
  - ☐ Critical
- **Symptoms at onset**
  - ☐ 0
  - ☐ 1
  - ☐ 2
  - ☐ 3
  - ☐ 4
  - ☐ 5 or more
- **Hospital admission during illness**
  - ☐ Yes
  - ☐ No
- **Length of in-hospital day**
  - ☐ Open answer
- **History of ICU admittance**
  - ☐ yes
  - ☐ no
- **Length of in-ICU Day**
  - ☐ Open answer
- **Need of oxygen therapy**
  - ☐ Yes
  - ☐ No
- **Treatment taken during the acute attack were recorded**

- vitamins
- minerals
- corticosteroid
- analgesics
- antipyretic

## **Post-covid symptoms**

### **➤ The number of complications**

- 0
- 1
- 2
- 3
- 4
- 5 or more

### **➤ The type of complication**

- Fatigue
- Anosmia\dysgeusia
- Neurological disorders
- Rheumatological disorders
- Dyspnea
- Psychiatric disorders
- Hair loss
- Cutaneous lesion
- Gastrointestinal disorders
- Chest pain
- Ocular symptoms
- Other

### **➤ The mean duration since the onset of the symptoms**

- (Open question)
